# Supplementary material
Source: PubMed Central journal article supplement (PMC6082723)
Supplement: NIHMS966382-supplement-1.pdf [file NIHMS966382-supplement-1.pdf]

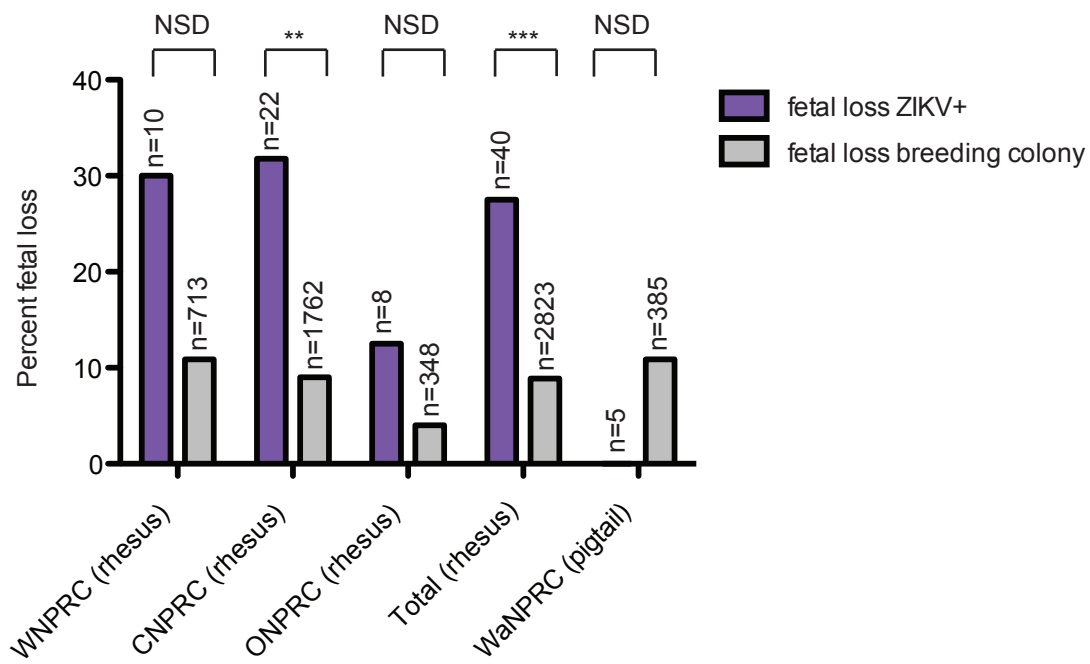

Supplementary Figure 1: Percent fetal loss in Zika inoculated pregnant animals or animals in breeding colonies from each macaque cohort. The raw data of fetal losses was compared to the raw data of live births in either Zika virus -exposed or Zika virus naive animals at each center using a Fisher's exact test. The raw numbers from each center in each group of rhesus macaques were then added together and compared in the Total column using a Chi-Square test. p-values are reported from each test respectively. NSD-not statistically different. \*\*p=0.003. \*\*\*p<0.0001.

**Supplementary Table 1: Average rates of fetal demise among nonhuman primate cohorts infected with ZIKV during pregnancy.**

|                       | ZIKV isolate               | Dose (PFU)          | Route of inoculation <sup>a</sup> | Ave. inoculation gestational age (GA) | inoculation GA that ended in demise | Fetal Demise n (%) |
|-----------------------|----------------------------|---------------------|-----------------------------------|---------------------------------------|-------------------------------------|--------------------|
| Rhesus macaque (n=6)  | Brazil SPH_2015 + PRVABC59 | 4 x10 <sup>3</sup>  | IA+IV                             | 48                                    | 45, 45, 51, 44                      | 4 (66.7)           |
| Rhesus macaque (n=4)  | Brazil SPH_2015            | 2 x10 <sup>5</sup>  | IA+IV                             | 61                                    | 41                                  | 1 (25)             |
| Rhesus macaque (n=2)  | FP/2013                    | 1x10 <sup>4</sup>   | SC                                | 33                                    | N/A                                 | 0                  |
| Rhesus macaque (n=2)  | FP/2013                    | 1x10 <sup>4</sup>   | SC                                | 112                                   | N/A                                 | 0                  |
| Rhesus macaque (n=12) | PRVABC59                   | 1x10 <sup>3</sup>   | SC                                | 30                                    | 30, 30                              | 2 (16.7)           |
| Rhesus macaque (n=8)  | PRVABC59                   | 1x10 <sup>4</sup>   | SC                                | 45                                    | 46, 46                              | 2 (25)             |
| Rhesus macaque (n=6)  | PRVABC59                   | 1x10 <sup>5</sup>   | SC                                | 49                                    | 54                                  | 1 (16.7)           |
| Rhesus macaque (n=2)  | PRVABC59                   | 1x10 <sup>5</sup>   | SC                                | 115                                   | N/A                                 | 0                  |
| Rhesus macaque (n=1)  | PRVABC59                   | 5x10 <sup>7</sup>   | SC                                | 50                                    | 50                                  | 1 (100)            |
| Pigtail macaque (n=2) | FSS 13025_Cambodia         | 5x10 <sup>7</sup>   | SC                                | 101                                   | N/A                                 | 0                  |
| Pigtail macaque (n=3) | Brazil 2015 Fortaleza      | 5x10 <sup>7</sup>   | SC                                | 61                                    | N/A                                 | 0                  |
| Common marmoset (n=2) | Brazil SPH_2015            | 2.5x10 <sup>5</sup> | IM                                | 76                                    | 79/83, 68/72                        | 2 (100)            |

<sup>a</sup>IA=intra-amniotic; IV=intravenous; SC=subcutaneous; IM=intramuscular. N/A=not applicable

**Supplementary Table 2: Rates of spontaneous abortion or stillbirth in healthy breeding colony rhesus (CNPRC, ONPRC, WNPRC) and pigtail (WaNPRC) macaques.**

| Institution        | Breeding season     | Spontaneous loss | Total pregnancies | Percent losses (%) |      |
|--------------------|---------------------|------------------|-------------------|--------------------|------|
| WNPRC              | 2012                | 20               | 114               | 17.5               |      |
|                    | 2013                | 11               | 113               | 9.7                |      |
|                    | 2014                | 10               | 142               | 7.0                |      |
|                    | 2015                | 10               | 103               | 9.7                |      |
|                    | 2016                | 12               | 124               | 9.7                |      |
|                    | 2017 (partial)      | 15               | 117               | 12.8               |      |
|                    |                     |                  |                   | Weighted average   | 10.9 |
| CNPRC              | 2008-2009           | 19               | 235               | 8.1                |      |
|                    | 2009-2010           | 23               | 242               | 9.5                |      |
|                    | 2010-2011           | 15               | 210               | 7.14               |      |
|                    | 2011-2012           | 23               | 230               | 10.0               |      |
|                    | 2012-2013           | 24               | 173               | 13.9               |      |
|                    | 2013-2014           | 15               | 165               | 9.1                |      |
|                    | 2014-2015           | 18               | 128               | 14.1               |      |
|                    | 2015-2016           | 10               | 187               | 5.4                |      |
|                    | 2016-2017 (partial) | 11               | 192               | 5.7                |      |
|                    |                     |                  | Weighted average  | 9.0                |      |
| ONPRC <sup>a</sup> | 2007                | 6                | 47                | 12.8               |      |
|                    | 2008                | 3                | 36                | 8.3                |      |
|                    | 2009                | 0                | 37                | 0.0                |      |
|                    | 2010                | 1                | 18                | 5.6                |      |
|                    | 2011                | 1                | 11                | 9.1                |      |
|                    | 2012                | 0                | 9                 | 0.0                |      |
|                    | 2013                | 0                | 6                 | 0.0                |      |
|                    | 2014                | 0                | 20                | 0.0                |      |
|                    | 2015                | 1                | 39                | 2.6                |      |
|                    | 2016                | 1                | 75                | 1.3                |      |
|                    | 2017 (partial)      | 1                | 50                | 2.0                |      |
|                    |                     |                  |                   | Weighted average   | 4.0  |
|                    | WaNPRC              | 2014             | 13                | 114                | 11.4 |
| 2015               |                     | 7                | 91                | 7.7                |      |
| 2016               |                     | 15               | 122               | 12.3               |      |
| 2017 (partial)     |                     | 7                | 58                | 12.1               |      |
|                    |                     |                  |                   | Weighted average   | 10.9 |

<sup>a</sup>Pregnancies were confirmed at greater than gestational day (GD) 30 and delivered by cesarean section between GD 135 and GD 155, and therefore the risk of very early or late-term abortion in healthy pregnant animals is not captured in these statistics from ONPRC. Other primate centers include data from animals with natural or C-section delivery between GD 155 and GD 165.

**Supplementary table 4: Detection of Zika virus RNA in maternal reproductive/fetal extraembryonic and fetal tissues from fetal demise and neonatal cases.**

| Institution | Animal ID                        | Pregnancy outcome                                                                           | Maternal reproductive/fetal extraembryonic tissues with positive ZIKV RNA*                 | Fetal tissues with positive ZIKV RNA*                                                                                                                                                                                                                                                                                                                                 | Limit of detection of viral load assay                  | Publication including data                                                                                      |
|-------------|----------------------------------|---------------------------------------------------------------------------------------------|--------------------------------------------------------------------------------------------|-----------------------------------------------------------------------------------------------------------------------------------------------------------------------------------------------------------------------------------------------------------------------------------------------------------------------------------------------------------------------|---------------------------------------------------------|-----------------------------------------------------------------------------------------------------------------|
| CNPRC       | 5303                             | Fetal death GD48                                                                            | Placenta, chorioamnion, umbilical cord, amniotic fluid                                     | Brain, liver, heart, lung, intestine, kidney                                                                                                                                                                                                                                                                                                                          | 100 RNA copies/ml fluid or 1000 copies per gm tissue    | Coffey et al (NCOMMS-17-31047B, in press)                                                                       |
| CNPRC       | 5508                             | Fetal death GD60                                                                            | Placenta, amniotic membranes, umbilical cord, amniotic fluid                               | Eye, lung, stomach, intestine, heart, kidney/adrenal, skin, urinary bladder                                                                                                                                                                                                                                                                                           | 100 RNA copies/ml fluid or 1000 copies per gm tissue    |                                                                                                                 |
| CNPRC       | 5374                             | Fetal death GD35                                                                            | Placenta, amniotic membranes                                                               | (No tissue available)                                                                                                                                                                                                                                                                                                                                                 | 100 RNA copies/ml fluid or 1000 copies per gm tissue    |                                                                                                                 |
| CNPRC       | 5463                             | PPROM with imminent abortion GD115                                                          | Placenta                                                                                   | Brain area 46, brain occipital lobe, kidney, lung, ileum                                                                                                                                                                                                                                                                                                              | 100 RNA copies/ml fluid or 1000 copies per gm tissue    |                                                                                                                 |
| CNPRC       | 5592                             | Fetal death GD59                                                                            | Placenta, amniotic membranes, umbilical cord                                               | Brain, eye, lung, liver, stomach, intestine, heart, kidney/adrenal, skin, urinary bladder                                                                                                                                                                                                                                                                             | 100 RNA copies/ml fluid or 1000 copies per gm tissue    |                                                                                                                 |
| CNPRC       | 5266                             | Stillbirth GD166                                                                            | Fetal placenta, maternal placenta, umbilical cord                                          | None                                                                                                                                                                                                                                                                                                                                                                  | 100 RNA copies/ml fluid or 1000 copies per gm tissue    |                                                                                                                 |
| CNPRC       | 5804                             | Fetal death GD86                                                                            | Placenta, amniotic membranes                                                               | Brain (parietal lobe), kidney, lung, ileum                                                                                                                                                                                                                                                                                                                            | 100 RNA copies/ml fluid or 1000 copies per gm tissue    |                                                                                                                 |
| WNPRC       | 527453 (dam)<br>291635 (fetus)   | Fetal death GD95                                                                            | Amniotic/chorionic membrane, decidua, placental disk 1, umbilical cord, and placental bed. | Adipose-omentum, aorta-thoracic, cerebrum, colon, cornea, dura mater, heart, jejunum, liver, lung, muscle-quadriceps, pericarium, retina, kidney, sclera, prostate, spleen, stomach, testis, thymus, urinary bladder, axillary LN.                                                                                                                                    | 100 copies/ml plasma or 192 copies/reaction for tissues | Mohr et al. PLoS One. Jan 30;13(1): e0190617. doi:10.1371/journal.pone.0190617.eCollection 2018. PMID:29381706. |
| WNPRC       | 125500 (dam)<br>411377 (fetus)   | Stillbirth GD155                                                                            | Amniotic/chorionic membrane, decidua, placental disc 1, umbilical cord, and placental bed. | Adipose-omentum, adrenal gland, cerebrum (5 sections), cervical spinal cord, cornea, dura mater, epidermis/dermis abdomen, esophagus, optic nerve, femur, heart, jejunum, liver, lumbar spinal cord, lung, mesenteric LN, ovary, pancreas, muscle-quadriceps, retina, kidney, sclera, spleen, stomach, thymus, thyroid, tongue, tonsil, urinary bladder, uterus.      | 100 copies/ml plasma or 192 copies/reaction for tissues |                                                                                                                 |
| WNPRC       | 795784 (dam)<br>499874 (neonate) | Live birth GD155; clinically indicated neonatal euthanasia GD162                            | Decidua (some still pending)                                                               | None                                                                                                                                                                                                                                                                                                                                                                  | 100 copies/ml plasma or 192 copies/reaction for tissues |                                                                                                                 |
| WNPRC       | 664184 (dam)<br>416597 (fetus)   | Fetal death GD133                                                                           | None (some still pending)                                                                  | None (some still pending)                                                                                                                                                                                                                                                                                                                                             | 100 copies/ml plasma or 192 copies/reaction for tissues |                                                                                                                 |
| SNPRC       | 34103                            | Fetal deaths GD95                                                                           | Placenta (ISH)                                                                             | Fetus abdomen/thorax (viral load)<br>Ocular muscle (ISH)                                                                                                                                                                                                                                                                                                              | 15 RNA copies/ml                                        | <a href="http://dx.doi.org/10.1101/259317">http://dx.doi.org/10.1101/259317</a>                                 |
| SNPRC       | 33722                            | Fetal death GD86                                                                            | Placenta (ISH)                                                                             | Fetus abdomen/thorax (viral load)<br>Ocular muscle, ophthalmic nerve, neuroprogenitor cells of the developing cortical plate (ISH)                                                                                                                                                                                                                                    | 15 RNA copies/ml                                        | <a href="http://dx.doi.org/10.1101/259317">http://dx.doi.org/10.1101/259317</a>                                 |
| ONPRC       | 24005 (dam)<br>36633 (fetus)     | PPROM GD118 and emergency cesarean; alive at delivery but non-viable due to gestational age | None                                                                                       | Submandibular gland, tonsil, parotid SG, thyroid gland, ovary, lumbar SC, trigeminal ganglion, bladder, triceps (qPCR)                                                                                                                                                                                                                                                | 400 copies/ug RNA                                       |                                                                                                                 |
| ONPRC       | 24002 (dam)<br>36634 (neonate)   | Preterm cervical dilation GD126 and emergency cesarean; neonatal death GD128                | MFI tissues unavailable for analysis                                                       | Esophagus, tonsil, trigeminal ganglion, uterus, bladder, finger, basal ganglion, bicep, ovary, eye, dorsal root ganglion, knee, sciatic nerve, adrenal gland, brachial radialis, thoracic SC, cervical SC, wrist stomach, liver, heart, ileum, parietal lobe (brain), kidney, cervical LN, inguinal LN, thymus, frontal lobe (brain), gall bladder, quadriceps (qPCR) | 400 copies/ug RNA                                       |                                                                                                                 |
| ONPRC       | 25689 (dam)<br>36635 (neonate)   | Live birth GD145; clinically indicated neonatal euthanasia GD162                            | Pending analysis                                                                           | Elbow, lumbar SC, retroperitoneal LN, thoracic SC, tonsil, cervix, pituitary, brachial plexus, toe (qPCR)                                                                                                                                                                                                                                                             | 400 copies/ug RNA                                       |                                                                                                                 |

\*Refer to <https://bit.ly/2GYd57g> for viral load quantifications.

**Supplementary table 5: Histopathology and ultrasound analysis of fetal demise and neonatal death cases following Zika virus infection.**

| Institution | Animal ID                        | Pregnancy outcome                                                                           | Major maternal reproductive/fetal extraembryonic histopathology**                                                                                                                                                                                                                                                                                                                                                                                                                                                    | Major Fetal histopathology**                                                                                                                                                                                                                                                                                                   | Ultrasound abnormalities*                                                                                                                                                                               | Citation/corresponding author for more information           | doi                                                                             |
|-------------|----------------------------------|---------------------------------------------------------------------------------------------|----------------------------------------------------------------------------------------------------------------------------------------------------------------------------------------------------------------------------------------------------------------------------------------------------------------------------------------------------------------------------------------------------------------------------------------------------------------------------------------------------------------------|--------------------------------------------------------------------------------------------------------------------------------------------------------------------------------------------------------------------------------------------------------------------------------------------------------------------------------|---------------------------------------------------------------------------------------------------------------------------------------------------------------------------------------------------------|--------------------------------------------------------------|---------------------------------------------------------------------------------|
| CNPRC       | 5303                             | Fetal death GD48                                                                            | Mild fibrinosuppurative placentitis with necrosis of trophoblasts (fetal); placenta had positive ISH                                                                                                                                                                                                                                                                                                                                                                                                                 | Fetal tissues had moderate autolysis; several tissues had positive ISH                                                                                                                                                                                                                                                         | None prior to fetal death                                                                                                                                                                               | Coffey/Van Rompay                                            | Coffey et al (NCOMMS-17-31047B; in press)                                       |
| CNPRC       | 5508                             | Fetal death GD60                                                                            | Possible placental separation, deciduitis                                                                                                                                                                                                                                                                                                                                                                                                                                                                            | Moderate to severe autolysis of fetal tissues                                                                                                                                                                                                                                                                                  | None prior to fetal death                                                                                                                                                                               | K. Van Rompay                                                |                                                                                 |
| CNPRC       | 5374                             | Fetal death GD35                                                                            | Possible placental separation, deciduitis                                                                                                                                                                                                                                                                                                                                                                                                                                                                            | Moderate autolysis of fetal tissues                                                                                                                                                                                                                                                                                            | None prior to fetal death                                                                                                                                                                               | K. Van Rompay                                                |                                                                                 |
| CNPRC       | 5463                             | PPROM with imminent abortion GD115                                                          | Neutrophilic amnionitis and placentitis with hemorrhage and trophoblastic necrosis (fetal)                                                                                                                                                                                                                                                                                                                                                                                                                           | Minimal hemorrhage in retina; neutrophils and erythrocytes within lungs and stomach and overlying the skin                                                                                                                                                                                                                     | None prior to abortion                                                                                                                                                                                  | K. Van Rompay                                                |                                                                                 |
| CNPRC       | 5592                             | Fetal death GD59                                                                            | Mild fibrinosuppurative placentitis with necrosis of trophoblasts (fetal)                                                                                                                                                                                                                                                                                                                                                                                                                                            | Moderate to severe autolysis of fetal tissues                                                                                                                                                                                                                                                                                  | None prior to fetal death                                                                                                                                                                               | K. Van Rompay                                                |                                                                                 |
| CNPRC       | 5266                             | Stillbirth GD166                                                                            | Large areas of trophoblastic necrosis and degeneration (fetal); basal decidual necrosis; mild neutrophilic funisitis                                                                                                                                                                                                                                                                                                                                                                                                 | Large infant (664 grams); few pulmonary neutrophils; brain: mild ventricular hemorrhage, mild loss of ependyma in lateral ventricle; congestion in other organs (likely dystocia)                                                                                                                                              | None prior to fetal death                                                                                                                                                                               | K. Van Rompay                                                |                                                                                 |
| CNPRC       | 5804                             | Fetal death GD86                                                                            | Placental necrosis with decidual hemorrhage and edema; trophoblastic proliferation and attenuation; hemorrhage within amniotic membranes                                                                                                                                                                                                                                                                                                                                                                             | Severe autolysis of fetus                                                                                                                                                                                                                                                                                                      | None prior to fetal death                                                                                                                                                                               | K. Van Rompay                                                |                                                                                 |
| WNPRC       | 527453 (dam)<br>291635 (fetus)   | Fetal death GD95                                                                            | Severe diffuse fibrinopurulent and necrotizing chorioamnionitis with multifocal mineralization of the decidua and amniotic and chorionic membranes. Diffuse suppurative and lymphoplasmacytic endometritis with multifocal necrosis and perivascular lymphoplasmacytic myometritis. Myometrial radial arteries show leukoclastic vasculitis. Suppurative placentitis with multifocal villous infarction, syncytial knots, marked multifocal mineralization, suppurative vasculitis, and multiple remote infarctions. | Choroidal coloboma, anterior segment dysgenesis, and dysplastic retina. Lung with numerous alveoli filled with fibrin, cellular debris and squamous cells admixed with neutrophils; alveolar walls are lined by hyperplastic type II pneumocytes with segmental thickening of the alveolar septa with infiltrated neutrophils. | Placental abruption and subchorionic hemorrhage which resolved. There was subsequent fetal echogenic and dilated bowel. Scant placental calcifications.                                                 | Mohr et al. PLoS One. Jan 30;13 (1):e0190617. PMID:29381706. | 10.1371/journal.pone.0190617. eCollection 2018                                  |
| WNPRC       | 125500 (dam)<br>411377 (fetus)   | Stillbirth GD155                                                                            | Severe segmental subacute chorioamnionic and placental coagulative necrosis and hemorrhage infarction. Scattered areas of villous infarcts. Marked multifocal chorionic and subacute villi mineralization. Possible acute non-occlusive umbilical cord thrombus at site of insertion into the chorionic plate.                                                                                                                                                                                                       | Multifocal lymphoplasmacytic and neutrophilic pericarditis. Amniotic fluid and squamous cell aspiration in lung tissue.                                                                                                                                                                                                        | Mild placental calcifications. Overall unremarkable fetal anatomy.                                                                                                                                      | David O'Connor                                               |                                                                                 |
| WNPRC       | 795784 (dam)<br>499874 (neonate) | Live birth GD155; clinically indicated neonatal euthanasia GD162                            | Uterus: minimal lymphocytic endometritis. Decidua: mild multifocal lymphoplasmacytic and minimal multifocal suppurative deciduitis with multifocal failure of physiologic transformation and remodeling of spiral arteries (persistently muscularized arteries). Placenta: multiple chronic (remote) infarctions with mild multifocal mineralization, suppurative placentitis and intervillitis.                                                                                                                     | Lungs with neutrophilic interstitial and alveolar inflammation. Suppurative otitis media. Minimal perivascular lymphoplasmacytic and neutrophilic pericarditis.                                                                                                                                                                | Echogenic bowel and pericardial effusion were noted and the echogenic bowel resolved within a few weeks. Mild placental calcifications. A possible small pericardial effusion persisted until delivery. | David O'Connor                                               |                                                                                 |
| WNPRC       | 664184 (dam)<br>416597 (fetus)   | Fetal death GD133                                                                           | Uterine diverticulum with transmural suppurative metritis, suppurative endometritis, multifocal myometrial vascular infarction, multifocal acute placental ischemia, and clinical dystocia.                                                                                                                                                                                                                                                                                                                          | Moderate to severe autolysis with post mortem cerebellar herniation through the foramen magnum due to dystocia. Lungs with moderate numbers of squamous cells (aspirated amniotic fluid) within alveoli. Minimal suppurative otitis media with luminal keratinized squamous cells.                                             | Fetal heart rate downtrended during the last 6 weeks of pregnancy. Scant placental calcifications.                                                                                                      | David O'Connor                                               |                                                                                 |
| SNPRC       | 34103                            | Fetal deaths GD95                                                                           | MFI not available                                                                                                                                                                                                                                                                                                                                                                                                                                                                                                    | Regions of disorganization of the cortical neurons                                                                                                                                                                                                                                                                             | none                                                                                                                                                                                                    | Jean Patterson                                               | <a href="http://dx.doi.org/10.1101/259317">http://dx.doi.org/10.1101/259317</a> |
| SNPRC       | 33722                            | Fetal death GD86                                                                            | None detected by hematoxylin and eosin staining                                                                                                                                                                                                                                                                                                                                                                                                                                                                      | None                                                                                                                                                                                                                                                                                                                           | none                                                                                                                                                                                                    | Jean Patterson                                               | <a href="http://dx.doi.org/10.1101/259317">http://dx.doi.org/10.1101/259317</a> |
| ONPRC       | 24005 (dam)<br>36633 (fetus)     | PPROM GD118 and emergency cesarean; alive at delivery but non-viable due to gestational age | Prominent foci of mineralization; increased perivillous and villous accumulation of fibrin; inflammatory infiltrates adjacent to remodeled vessels                                                                                                                                                                                                                                                                                                                                                                   | None detected by hematoxylin and eosin staining                                                                                                                                                                                                                                                                                | Moderate preterm placental calcification; BPD and HC trending below mean                                                                                                                                | Dan Streblov                                                 |                                                                                 |
| ONPRC       | 24002 (dam)<br>36634 (neonate)   | Preterm cervical dilation GD126 and emergency cesarean; neonatal death GD128                | None detected by hematoxylin and eosin staining                                                                                                                                                                                                                                                                                                                                                                                                                                                                      | Minor autolysis of neonatal tissues; multifocal suppurative cerebral encephalitis; diffuse cerebellar external granular layer apoptosis and necrosis                                                                                                                                                                           | Mild preterm placental calcification                                                                                                                                                                    | Dan Streblov                                                 |                                                                                 |
| ONPRC       | 25689 (dam)<br>366354 (neonate)  | Live birth GD145; clinically indicated neonatal euthanasia GD162                            | None detected by hematoxylin and eosin staining                                                                                                                                                                                                                                                                                                                                                                                                                                                                      | Left ventricular hypertrophic cardiomyopathy                                                                                                                                                                                                                                                                                   | Mild preterm placental calcification                                                                                                                                                                    | Dan Streblov                                                 |                                                                                 |

\*Additional information about the results of each US test and some images can be found at <https://bit.ly/2GYd57g>

\*\*Note: necrosis may be the result of fetal death in utero prior to tissue collection and may not be part of the etiology caused directly by ZIKV infection.

Images representing the findings listed here can be found at <https://bit.ly/2GYd57g>
